# Supplementary material for: Reporting a novel visible near-infrared {Tb3}[Ga0.1Sc1.9](Al3)O12 single crystal for Faraday isolators
Source: Royal Society of Chemistry journal article supplement (doi:10.1039/d3tc01459b), 2023-01-01
Supplement: d3tc01459b1.pdf [file d3tc01459b1.pdf]

## Supporting information

### Reporting a novel visible near-infrared $\{\text{Tb}_3\}[\text{Ga}_{0.1}\text{Sc}_{1.9}](\text{Al}_3)\text{O}_{12}$ single crystal for Faraday isolators

*Yuankai Hao<sup>a</sup>, Xianhui Xin<sup>a</sup>, Xianxian Yang<sup>a</sup>, Zhen Zhang<sup>a</sup>, Xiuwei Fu<sup>a,\*</sup>, Zhitai Jia<sup>a,b,\*</sup>, and Xutang Tao<sup>a</sup>*

a. State Key Laboratory of Crystal Materials, Shandong University, Jinan, Shandong 250100, China.

b. Shandong Research Institute of Industrial Technology, Jinan, Shandong 250100, China.

\* Corresponding author: [fxw@sdu.edu.cn](mailto:fxw@sdu.edu.cn), [z.jia@sdu.edu.cn](mailto:z.jia@sdu.edu.cn)

Figure S1. (a) As-grown TSAG crystal; (b) Cracking happened during the processing.

Table S1. Atomic coordinates and equivalent isotropic displacement parameters ( $\text{\AA}^2$ ) for TGSAG.

Table S2. Atomic displacement parameters ( $\text{\AA}^2$ ) for TGSAG.

Table S3. Geometric parameters ( $\text{\AA}$ ,  $^\circ$ ) in TGSAG.

Table S4. XRF detailed data of five selected regions in TGSAG crystal.

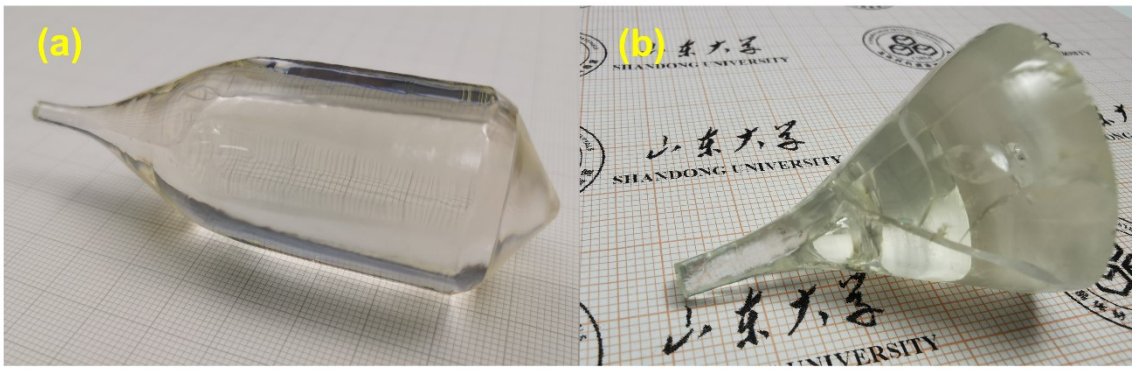

Figure S1. (a) As-grown TSAG crystal; (b)Cracking happened during the processing.

Table S1. Atomic coordinates and equivalent isotropic displacement parameters ( $\text{\AA}^2$ ) for TGSAG.

|     | <i>x</i>   | <i>y</i>   | <i>z</i>   | $U_{iso}^*/U_{eq}$ | Occ. (<1) |
|-----|------------|------------|------------|--------------------|-----------|
| Tb1 | 1.125      | 0.5        | 0.75       | 0.00657 (19)       |           |
| Sc1 | 1.0        | 0.5        | 0.5        | 0.0082 (4)         | 0.95      |
| Al1 | 0.875      | 0.5        | 0.75       | 0.0026 (5)         |           |
| Ga1 | 1.0        | 0.5        | 0.5        | 0.0082 (4)         | 0.05      |
| O1  | 0.9684 (2) | 0.4447 (2) | 0.6555 (2) | 0.0074 (5)         |           |

Table S2. Atomic displacement parameters ( $\text{\AA}^2$ ) for TGSAG.

|     | $U^{11}$    | $U^{22}$    | $U^{33}$    | $U^{12}$    | $U^{13}$    | $U^{23}$      |
|-----|-------------|-------------|-------------|-------------|-------------|---------------|
| Tb1 | 0.0049 (2)  | 0.0074 (2)  | 0.0074 (2)  | 0           | 0           | -0.00131 (11) |
| Sc1 | 0.0082 (4)  | 0.0082 (4)  | 0.0082 (4)  | 0.0002 (3)  | -0.0002 (3) | 0.0002 (3)    |
| Al1 | 0.0011 (9)  | 0.0033 (7)  | 0.0033 (7)  | 0           | 0           | 0             |
| Ga1 | 0.0082 (4)  | 0.0082 (4)  | 0.0082 (4)  | 0.0002 (3)  | -0.0002 (3) | 0.0002 (3)    |
| O1  | 0.0063 (12) | 0.0072 (12) | 0.0087 (12) | 0.0006 (10) | 0.0007 (10) | 0.0000 (10)   |

Table S3. Geometric parameters ( $\text{\AA}$ ,  $^\circ$ ) in TGSAG.

|                         |            |                        |            |
|-------------------------|------------|------------------------|------------|
| Tb1—O1 <sup>i</sup>     | 2.359 (3)  | Tb1—Sc1                | 3.4509 (1) |
| Tb1—O1 <sup>ii</sup>    | 2.359 (3)  | Sc1—O1 <sup>x</sup>    | 2.074 (3)  |
| Tb1—O1 <sup>iii</sup>   | 2.359 (3)  | Sc1—O1 <sup>vi</sup>   | 2.074 (3)  |
| Tb1—O1                  | 2.359 (3)  | Sc1—O1 <sup>xi</sup>   | 2.074 (3)  |
| Tb1—O1 <sup>iv</sup>    | 2.465 (3)  | Sc1—O1 <sup>xii</sup>  | 2.074 (3)  |
| Tb1—O1 <sup>v</sup>     | 2.465 (3)  | Sc1—O1 <sup>xiii</sup> | 2.074 (3)  |
| Tb1—O1 <sup>vi</sup>    | 2.465 (3)  | Sc1—O1                 | 2.074 (3)  |
| Tb1—O1 <sup>vii</sup>   | 2.465 (3)  | Al1—O1 <sup>iii</sup>  | 1.776 (3)  |
| Tb1—Al1                 | 3.0866 (1) | Al1—O1                 | 1.776 (3)  |
| Tb1—Al1 <sup>viii</sup> | 3.0866 (1) | Al1—O1 <sup>xiv</sup>  | 1.776 (3)  |
| Tb1—Sc1 <sup>ix</sup>   | 3.4509 (1) | Al1—O1 <sup>xv</sup>   | 1.776 (3)  |

|                                            |             |                                             |              |
|--------------------------------------------|-------------|---------------------------------------------|--------------|
| O1 <sup>i</sup> —Tb1—O1 <sup>ii</sup>      | 69.90 (14)  | O1 <sup>vi</sup> —Sc1—O1                    | 86.09 (11)   |
| O1 <sup>i</sup> —Tb1—O1 <sup>iii</sup>     | 112.69 (14) | O1 <sup>xi</sup> —Sc1—O1                    | 93.91 (11)   |
| O1 <sup>ii</sup> —Tb1—O1 <sup>iii</sup>    | 163.30 (14) | O1 <sup>xii</sup> —Sc1—O1                   | 86.09 (11)   |
| O1 <sup>i</sup> —Tb1—O1                    | 163.30 (14) | O1 <sup>xiii</sup> —Sc1—O1                  | 180.00 (15)  |
| O1 <sup>ii</sup> —Tb1—O1                   | 112.69 (14) | O1 <sup>x</sup> —Sc1—Tb1 <sup>xiii</sup>    | 44.92 (8)    |
| O1 <sup>iii</sup> —Tb1—O1                  | 69.90 (14)  | O1 <sup>vi</sup> —Sc1—Tb1 <sup>xiii</sup>   | 135.08 (8)   |
| O1 <sup>i</sup> —Tb1—O1 <sup>iv</sup>      | 124.18 (6)  | O1 <sup>xi</sup> —Sc1—Tb1 <sup>xiii</sup>   | 91.22 (7)    |
| O1 <sup>ii</sup> —Tb1—O1 <sup>iv</sup>     | 71.86 (14)  | O1 <sup>xii</sup> —Sc1—Tb1 <sup>xiii</sup>  | 88.78 (7)    |
| O1 <sup>iii</sup> —Tb1—O1 <sup>iv</sup>    | 94.51 (8)   | O1 <sup>xiii</sup> —Sc1—Tb1 <sup>xiii</sup> | 41.97 (8)    |
| O1—Tb1—O1 <sup>iv</sup>                    | 70.80 (11)  | O1—Sc1—Tb1 <sup>xiii</sup>                  | 138.03 (8)   |
| O1 <sup>i</sup> —Tb1—O1 <sup>v</sup>       | 70.80 (11)  | O1 <sup>x</sup> —Sc1—Tb1                    | 135.08 (8)   |
| O1 <sup>ii</sup> —Tb1—O1 <sup>v</sup>      | 94.51 (8)   | O1 <sup>vi</sup> —Sc1—Tb1                   | 44.92 (8)    |
| O1 <sup>iii</sup> —Tb1—O1 <sup>v</sup>     | 71.86 (14)  | O1 <sup>xi</sup> —Sc1—Tb1                   | 88.78 (7)    |
| O1—Tb1—O1 <sup>v</sup>                     | 124.18 (6)  | O1 <sup>xii</sup> —Sc1—Tb1                  | 91.22 (7)    |
| O1 <sup>iv</sup> —Tb1—O1 <sup>v</sup>      | 73.39 (13)  | O1 <sup>xiii</sup> —Sc1—Tb1                 | 138.03 (8)   |
| O1 <sup>i</sup> —Tb1—O1 <sup>vi</sup>      | 94.51 (8)   | O1—Sc1—Tb1                                  | 41.97 (8)    |
| O1 <sup>ii</sup> —Tb1—O1 <sup>vi</sup>     | 70.80 (11)  | Tb1 <sup>xiii</sup> —Sc1—Tb1                | 180.0        |
| O1 <sup>iii</sup> —Tb1—O1 <sup>vi</sup>    | 124.18 (6)  | O1 <sup>x</sup> —Sc1—Tb1 <sup>vi</sup>      | 138.03 (8)   |
| O1—Tb1—O1 <sup>vi</sup>                    | 71.86 (14)  | O1 <sup>vi</sup> —Sc1—Tb1 <sup>vi</sup>     | 41.97 (8)    |
| O1 <sup>iv</sup> —Tb1—O1 <sup>vi</sup>     | 109.42 (13) | O1 <sup>xi</sup> —Sc1—Tb1 <sup>vi</sup>     | 135.08 (8)   |
| O1 <sup>v</sup> —Tb1—O1 <sup>vi</sup>      | 162.43 (13) | O1 <sup>xii</sup> —Sc1—Tb1 <sup>vi</sup>    | 44.92 (8)    |
| O1 <sup>i</sup> —Tb1—O1 <sup>vii</sup>     | 71.86 (14)  | O1 <sup>xiii</sup> —Sc1—Tb1 <sup>vi</sup>   | 88.78 (7)    |
| O1 <sup>ii</sup> —Tb1—O1 <sup>vii</sup>    | 124.18 (6)  | O1—Sc1—Tb1 <sup>vi</sup>                    | 91.22 (7)    |
| O1 <sup>iii</sup> —Tb1—O1 <sup>vii</sup>   | 70.80 (11)  | Tb1 <sup>xiii</sup> —Sc1—Tb1 <sup>vi</sup>  | 113.6        |
| O1—Tb1—O1 <sup>vii</sup>                   | 94.51 (8)   | Tb1—Sc1—Tb1 <sup>vi</sup>                   | 66.4         |
| O1 <sup>iv</sup> —Tb1—O1 <sup>vii</sup>    | 162.43 (13) | O1 <sup>x</sup> —Sc1—Tb1 <sup>x</sup>       | 41.97 (8)    |
| O1 <sup>v</sup> —Tb1—O1 <sup>vii</sup>     | 109.42 (13) | O1 <sup>vi</sup> —Sc1—Tb1 <sup>x</sup>      | 138.03 (8)   |
| O1 <sup>vi</sup> —Tb1—O1 <sup>vii</sup>    | 73.39 (13)  | O1 <sup>xi</sup> —Sc1—Tb1 <sup>x</sup>      | 44.92 (8)    |
| O1 <sup>i</sup> —Tb1—Al1                   | 145.05 (7)  | O1 <sup>xii</sup> —Sc1—Tb1 <sup>x</sup>     | 135.08 (8)   |
| O1 <sup>ii</sup> —Tb1—Al1                  | 145.05 (7)  | O1 <sup>xiii</sup> —Sc1—Tb1 <sup>x</sup>    | 91.22 (7)    |
| O1 <sup>iii</sup> —Tb1—Al1                 | 34.95 (7)   | O1—Sc1—Tb1 <sup>x</sup>                     | 88.78 (7)    |
| O1—Tb1—Al1                                 | 34.95 (7)   | Tb1 <sup>xiii</sup> —Sc1—Tb1 <sup>x</sup>   | 66.4         |
| O1 <sup>iv</sup> —Tb1—Al1                  | 81.22 (7)   | Tb1—Sc1—Tb1 <sup>x</sup>                    | 113.6        |
| O1 <sup>v</sup> —Tb1—Al1                   | 98.78 (7)   | Tb1 <sup>vi</sup> —Sc1—Tb1 <sup>x</sup>     | 180.0        |
| O1 <sup>vi</sup> —Tb1—Al1                  | 98.78 (7)   | O1 <sup>x</sup> —Sc1—Tb1 <sup>xvi</sup>     | 91.22 (7)    |
| O1 <sup>vii</sup> —Tb1—Al1                 | 81.22 (7)   | O1 <sup>vi</sup> —Sc1—Tb1 <sup>xvi</sup>    | 88.78 (7)    |
| O1 <sup>i</sup> —Tb1—Al1 <sup>viii</sup>   | 34.95 (7)   | O1 <sup>xi</sup> —Sc1—Tb1 <sup>xvi</sup>    | 41.97 (8)    |
| O1 <sup>ii</sup> —Tb1—Al1 <sup>viii</sup>  | 34.95 (7)   | O1 <sup>xii</sup> —Sc1—Tb1 <sup>xvi</sup>   | 138.03 (8)   |
| O1 <sup>iii</sup> —Tb1—Al1 <sup>viii</sup> | 145.05 (7)  | O1 <sup>xiii</sup> —Sc1—Tb1 <sup>xvi</sup>  | 44.92 (8)    |
| O1—Tb1—Al1 <sup>viii</sup>                 | 145.05 (7)  | O1—Sc1—Tb1 <sup>xvi</sup>                   | 135.08 (8)   |
| O1 <sup>iv</sup> —Tb1—Al1 <sup>viii</sup>  | 98.78 (7)   | Tb1 <sup>xiii</sup> —Sc1—Tb1 <sup>xvi</sup> | 66.4220 (10) |
| O1 <sup>v</sup> —Tb1—Al1 <sup>viii</sup>   | 81.22 (7)   | Tb1—Sc1—Tb1 <sup>xvi</sup>                  | 113.6        |
| O1 <sup>vi</sup> —Tb1—Al1 <sup>viii</sup>  | 81.22 (7)   | Tb1 <sup>vi</sup> —Sc1—Tb1 <sup>xvi</sup>   | 113.6        |
| O1 <sup>vii</sup> —Tb1—Al1 <sup>viii</sup> | 98.78 (7)   | Tb1 <sup>x</sup> —Sc1—Tb1 <sup>xvi</sup>    | 66.4         |

|                                            |            |                                              |             |
|--------------------------------------------|------------|----------------------------------------------|-------------|
| All—Tb1—All <sup>viii</sup>                | 180.0      | O1 <sup>x</sup> —Sc1—Tb1 <sup>xvii</sup>     | 88.78 (7)   |
| O1 <sup>i</sup> —Tb1—Sc1 <sup>ix</sup>     | 36.01 (7)  | O1 <sup>vi</sup> —Sc1—Tb1 <sup>xvii</sup>    | 91.22 (7)   |
| O1 <sup>ii</sup> —Tb1—Sc1 <sup>ix</sup>    | 94.35 (7)  | O1 <sup>xi</sup> —Sc1—Tb1 <sup>xvii</sup>    | 138.03 (8)  |
| O1 <sup>iii</sup> —Tb1—Sc1 <sup>ix</sup>   | 96.19 (7)  | O1 <sup>xii</sup> —Sc1—Tb1 <sup>xvii</sup>   | 41.97 (8)   |
| O1—Tb1—Sc1 <sup>ix</sup>                   | 128.70 (7) | O1 <sup>xiii</sup> —Sc1—Tb1 <sup>xvii</sup>  | 135.08 (8)  |
| O1 <sup>iv</sup> —Tb1—Sc1 <sup>ix</sup>    | 160.19 (7) | O1—Sc1—Tb1 <sup>xvii</sup>                   | 44.92 (8)   |
| O1 <sup>v</sup> —Tb1—Sc1 <sup>ix</sup>     | 94.21 (6)  | Tb1 <sup>xiii</sup> —Sc1—Tb1 <sup>xvii</sup> | 113.6       |
| O1 <sup>vi</sup> —Tb1—Sc1 <sup>ix</sup>    | 77.87 (7)  | Tb1—Sc1—Tb1 <sup>xvii</sup>                  | 66.4        |
| O1 <sup>vii</sup> —Tb1—Sc1 <sup>ix</sup>   | 36.47 (7)  | Tb1 <sup>vi</sup> —Sc1—Tb1 <sup>xvii</sup>   | 66.4        |
| All—Tb1—Sc1 <sup>ix</sup>                  | 116.6      | Tb1 <sup>x</sup> —Sc1—Tb1 <sup>xvii</sup>    | 113.6       |
| All <sup>viii</sup> —Tb1—Sc1 <sup>ix</sup> | 63.4       | Tb1 <sup>xvi</sup> —Sc1—Tb1 <sup>xvii</sup>  | 180.0       |
| O1 <sup>i</sup> —Tb1—Sc1                   | 128.70 (7) | O1 <sup>iii</sup> —All—O1                    | 99.09 (18)  |
| O1 <sup>ii</sup> —Tb1—Sc1                  | 96.19 (7)  | O1 <sup>iii</sup> —All—O1 <sup>xiv</sup>     | 114.90 (10) |
| O1 <sup>iii</sup> —Tb1—Sc1                 | 94.35 (7)  | O1—All—O1 <sup>xiv</sup>                     | 114.90 (10) |
| O1—Tb1—Sc1                                 | 36.01 (7)  | O1 <sup>iii</sup> —All—O1 <sup>xv</sup>      | 114.90 (10) |
| O1 <sup>iv</sup> —Tb1—Sc1                  | 94.21 (6)  | O1—All—O1 <sup>xv</sup>                      | 114.90 (10) |
| O1 <sup>v</sup> —Tb1—Sc1                   | 160.19 (7) | O1 <sup>xiv</sup> —All—O1 <sup>xv</sup>      | 99.09 (18)  |
| O1 <sup>vi</sup> —Tb1—Sc1                  | 36.47 (7)  | O1 <sup>iii</sup> —All—Tb1 <sup>xviii</sup>  | 130.46 (9)  |
| O1 <sup>vii</sup> —Tb1—Sc1                 | 77.87 (7)  | O1—All—Tb1 <sup>xviii</sup>                  | 130.45 (9)  |
| All—Tb1—Sc1                                | 63.4       | O1 <sup>xiv</sup> —All—Tb1 <sup>xviii</sup>  | 49.54 (9)   |
| All <sup>viii</sup> —Tb1—Sc1               | 116.6      | O1 <sup>xv</sup> —All—Tb1 <sup>xviii</sup>   | 49.54 (9)   |
| Sc1 <sup>ix</sup> —Tb1—Sc1                 | 101.5      | O1 <sup>iii</sup> —All—Tb1                   | 49.54 (9)   |
| O1 <sup>x</sup> —Sc1—O1 <sup>vi</sup>      | 180.0      | O1—All—Tb1                                   | 49.55 (9)   |
| O1 <sup>x</sup> —Sc1—O1 <sup>xi</sup>      | 86.09 (11) | O1 <sup>xiv</sup> —All—Tb1                   | 130.45 (9)  |
| O1 <sup>vi</sup> —Sc1—O1 <sup>xi</sup>     | 93.91 (11) | O1 <sup>xv</sup> —All—Tb1                    | 130.45 (9)  |
| O1 <sup>x</sup> —Sc1—O1 <sup>xii</sup>     | 93.91 (11) | Tb1 <sup>xviii</sup> —All—Tb1                | 180.0       |
| O1 <sup>vi</sup> —Sc1—O1 <sup>xii</sup>    | 86.09 (11) | All—O1—Sc1                                   | 127.13 (15) |
| O1 <sup>xi</sup> —Sc1—O1 <sup>xii</sup>    | 180.0      | All—O1—Tb1                                   | 95.50 (12)  |
| O1 <sup>x</sup> —Sc1—O1 <sup>xiii</sup>    | 86.09 (11) | Sc1—O1—Tb1                                   | 102.02 (12) |
| O1 <sup>vi</sup> —Sc1—O1 <sup>xiii</sup>   | 93.91 (11) | All—O1—Tb1 <sup>xvii</sup>                   | 125.30 (14) |
| O1 <sup>xi</sup> —Sc1—O1 <sup>xiii</sup>   | 86.09 (11) | Sc1—O1—Tb1 <sup>xvii</sup>                   | 98.61 (11)  |
| O1 <sup>xii</sup> —Sc1—O1 <sup>xiii</sup>  | 93.91 (11) | Tb1—O1—Tb1 <sup>xvii</sup>                   | 103.16 (10) |
| O1 <sup>x</sup> —Sc1—O1                    | 93.91 (11) |                                              |             |

Symmetry codes: (i)  $-x+9/4, -z+5/4, -y+5/4$ ; (ii)  $-x+9/4, z-1/4, y+1/4$ ; (iii)  $x, -y+1, -z+3/2$ ; (iv)  $-z+7/4, -y+3/4, -x+7/4$ ; (v)  $z+1/2, x-1/2, y+1/2$ ; (vi)

$z+1/2, -x+3/2, -y+1$ ; (vii)  $-z+7/4, y+1/4, x-1/4$ ; (viii)  $x+1/2, y, -z+3/2$ ; (ix)  $y+3/4, -x+7/4, z+1/4$ ; (x)  $-z+3/2, x-1/2, y$ ; (xi)  $y+1/2, z, -x+3/2$ ; (xii)

$-y+3/2, -z+1, x-1/2$ ; (xiii)  $-x+2, -y+1, -z+1$ ; (xiv)  $-x+7/4, z-1/4, -y+5/4$ ; (xv)  $-x+7/4, -z+5/4, y+1/4$ ; (xvi)  $-y+3/2, -z+3/2, -x+3/2$ ; (xvii)  $y+1/2, z-1/2, x-1/2$ ;

(xviii)  $x-1/2, y, -z+3/2$ .

Table S4. XRF detailed data (mass%) of five selected regions in TGSAG crystal.

| Positions | Elements | Tb    | Ga   | Sc    | Al    |
|-----------|----------|-------|------|-------|-------|
| 1         |          | 74.10 | 1.33 | 11.20 | 13.40 |
| 2         |          | 74.90 | 1.30 | 11.40 | 12.50 |
| 3         |          | 74.40 | 1.30 | 11.30 | 13.10 |
| 4         |          | 74.90 | 1.27 | 11.30 | 12.50 |
| 5         |          | 74.80 | 1.27 | 11.40 | 12.50 |
